# Supplementary material for: Testing the IMEter on rice introns and other aspects of intron-mediated enhancement of gene expression
Source: PubMed Central journal article supplement — J Exp Bot. 2010 Sep 20;62(2):533–44. doi: 10.1093/jxb/erq273 (PMC3003800; doi:10.1093/jxb/erq273), 2010-09-20
Supplement: supp_erq273_00048538-file001.pdf [file supp_erq273_00048538-file001.pdf]

**An alternative pathway for ureide usage in legumes: enzymatic formation of a ureidoglycolate adduct in *Cicer arietinum* and *Phaseolus vulgaris***

*Alfonso Muñoz, Gerard L Bannenberg, Olimpio Montero, Juan Miguel Cabello-Diaz, Pedro Piedras, and Manuel Pineda*

**Supplementary Material**

| Table1. Sequence of the primers used for cloning and RT-PCR |                                       |                                        |
|-------------------------------------------------------------|---------------------------------------|----------------------------------------|
| Target sequence                                             | Fw Primer                             | Rev Primer                             |
| OsTua2 FI                                                   | GT <b>GAATTC</b> ACAAAAACGGATCTGATGC  | GG <b>CTGCAG</b> AGGACAAAACAAGATTTCAAC |
| OsTua3 FI                                                   | GT <b>GAATTC</b> GAATCCCCCTCCCCCT     | GG <b>CTGCAG</b> AGAGCAAACAGCACAATGT   |
| Ostub4 LI                                                   | GT <b>GAATTC</b> AATCTTCGACTCTCTCGTAC | GG <b>CTGCAG</b> AGGGAAGTGGAACAACACTG  |
| OsTub4 sLI                                                  | GT <b>GAATTC</b> ACCTCCTTTGTGCTTTAGAT | GG <b>CTGCAG</b> AGGGAAGTGGAACAACACTG  |
| OsCPK2 LI                                                   | GT <b>GAATTC</b> CCCTCCTTTGCTTGGGTA   | GG <b>CTGCAG</b> GCAGAACCAAGAAGGAACA   |
| OsCPK2 sLI                                                  | GT <b>GAATTC</b> GCTGTCAAAGGCATTTCC   | GG <b>CTGCAG</b> GCAGAACCAAGAAGGAACA   |
| AtTub6 LI                                                   | GT <b>GAATTC</b> TGTTTACTCTGCTATTTCC  | GG <b>CTGCAG</b> TCAACATTACATGAACAAAA  |
| OsTub6 5'splice site                                        | CCAAGGGTATATCCGTTATTCC                | GTTGCG <b>GAATTC</b> ATCTCGAATCA       |
| GFP                                                         | ATGGTGAGCAAGGGCGAGGAGCT               | GTAGCGGCTGAAGCACTGCACG                 |
| GUS                                                         | CAGCGAAGAGGCAGTCAACGGGGAA             | CATTGTTTGCCTCCCTGCGGTT                 |
| Replacing introns                                           | CTTCCTAGCCCTGATTCGAG                  | CTTTGCCGTAATGAGATGACCGC                |

In **red**: *Eco*RI restriction site. In **blue**: *Pst*I restriction site. In **bold** the point mutation introduced

| Table 2. IMEter score of first introns of all rice tubulin genes |                           |              |                      |              |
|------------------------------------------------------------------|---------------------------|--------------|----------------------|--------------|
|                                                                  | leader intron length (bp) | IMEter score | intron 1 length (bp) | IMEter score |
| <b>Ostub1</b>                                                    | 580                       | 223,7        | 713                  | -14,0        |
| <b>Ostub2</b>                                                    | ---                       |              | 96                   | -0,7         |
| <b>Ostub3</b>                                                    | ---                       |              | 245                  | 86,2         |
| <b>Ostub4</b>                                                    | 883                       | 156,8        | 607                  | -109,7       |
| <b>Ostub5</b>                                                    | ---                       |              | 820                  | 92,0         |
| <b>Ostub6</b>                                                    | 445                       | 256,9        | 101                  | 21,4         |
| <b>Ostub7</b>                                                    | ---                       |              | 1104                 | -20,3        |
| <b>Ostub8</b>                                                    | ---                       |              | 2089                 | -38,9        |
| <b>Ostua1</b>                                                    | ---                       |              | 946                  | 90           |
| <b>Ostua2</b>                                                    | ---                       |              | 892                  | 174,2        |
| <b>Ostua3</b>                                                    | ---                       |              | 907                  | 273,6        |
